# Supplementary material for: Bio-Based Polyols from Seed Oils for Water-Blown Rigid Polyurethane Foam Preparation
Source: Hindawi journal article supplement (doi:10.1155/2016/4909857), 2016-01-01
Supplement: f1 [file 4909857.f1.docx]

**Supporting Information**

Biobased polyols from seed oils for water-blown rigid polyurethane foam preparation

**Paweena Ekkaphan1, Sarintip Sooksai2, Nuanphun Chantarasiri3 and Amorn Petsom3,***

1Program of Petrochemistry, Faculty of Science, Chulalongkorn University, Bangkok, 10330, Thailand

2Institute of Biotechnology and Genetic Engineering, Chulalongkorn University, Bangkok, 10330, Thailand

3Department of Chemistry, Faculty of Science, Chulalongkorn University, Bangkok, 10330, Thailand
*Correspondence should be addressed to Amorn Petsom; amorn.p@chula.ac.th

FIGURE S1: 1H NMR and 13C NMR spectra in CDCl3 of sesame seed oil-based polyol (SSOB).

FIGURE S2: 1H NMR and 13C NMR spectra in CDCl3 of pumpkin seed oil-based polyol (POB).
